# Supplementary material for: Unraveling the genomic architecture of supernumerary (iso-) dicentric chromosomes in Dup15q syndrome: Insight from a systematic literature-based study
Source: Research Square preprint supplement (doi:10.21203/rs.3.rs-5833554/v1), 2025-01-28
Supplement: Supplementary file 2 [file 3335e836eb036b0250635550.xlsx]

## Sheet: Suppl. Table 1
Software and Packages
R Version	4.4.0 (2024-04-24)
Platform	x86_64-apple-darwin20
Package	Version
esquisse	2.0.1
ggthemes	5.1.0
rnaturalearthdata	1.0.0
rnaturalearth	1.0.1
tm	0.7-15
NLP	0.3-2
wordcloud	2.6
plotly	4.10.4
patchwork	1.3.0
ggalt	0.4.0
gridExtra	2.3
RColorBrewer	1.1-3
readxl	1.4.3
lubridate	1.9.4
forcats	1.0.0
stringr	1.5.1
dplyr	1.1.4
purrr	1.0.2
readr	2.1.5
tidyr	1.3.1
tibble	3.2.1
ggplot2	3.5.1
tidyverse	2.0.0

## Sheet: Suppl. Table 2
Literature-based cohort of published patient-level genetic data for Dup15q syndrome
Year	First author	Individual identifier	Reference genome used	Genomic Position	Recurrent Breaktpoints (BP1-5)	Size (kb)	Parental-Origin	CNV of the regions	Description/Comment	Supernumerary chromosome (i)dic(15)	Interstitial CN-gain	Diagnostic tool used	Nomenclature	Country
2022	Shehi	P1	GRCh37	NA	BP1-BP5	NA	Maternal	3x BP1-BP5		No	Yes	Array		United States of America
2023	Mim	P2	GRCh38	23,443,796–28,289,373	BP2-BP3	4845.58	NA	3xBP2-BP3		NA	NA	Array, ddPCR	extra isodicentric 15 chromosome	Bangladesh
2023	Mim	P3	GRCh38	20,802,382–28,371,148	BP1-BP3	7568.77	NA	4xBP1-BP3		NA	NA	Array, ddPCR	extra isodicentric 15 chromosome	Bangladesh
2021	Prado	P4	GRCh37	22765637-25259734	BP1-BP2/3	2400	Maternal	3x BP1-BP2/3(2,5)		No	Yes	ChA, Array		Ecuador
2015	Dawson	P5	GRCh37	23,664,484-28,602,810	BP2-BP3	5000	Maternal	3xBP2-BP3		No	Yes	Array, FISH, MS-MLPA		Canada
2009	Orrico	P6	GRCh37	NA	BP2-BP3	4000	Maternal	3xBP2-BP3		No	Yes	ChA, Microsatellite analysis	idic(15), pseudodicentric chromosome 15	Italy
2013	Coppola	P7	GRCh37	19,109,124-26,198,996	BP1-BP3	7000	NA	3xBP1-BP3		No	Yes	Array		United Kingdom
2013	Coppola	P8	GRCh37	21,150,280-26,761,440	BP1-BP3	5600	NA	3xBP1-BP3		No	Yes	Array, ChA		United Kingdom
2021	Han	P9	GRCh37	23,290,787_28,704,050	BP2-BP3	5400	Maternal	3xBP2-BP3		No	Yes	Array, ChA		South Korea
2021	Han	P10	GRCh37	23,290,787_28,704,050	BP2-BP3	5400	Maternal	3xBP2-BP3		No	Yes	Array, ChA		South Korea
2021	Han	P11	GRCh37	23,290,787_28,704,050	BP2-BP3	5400	Maternal	3xBP2-BP3		No	Yes	Array, ChA		South Korea
1997	Battaglia	P12	NA	NA	NA	NA	NA	4x		Yes	No	ChA, FISH	extra structurally abnormal chromosomes, ESAC, inv dup(15), Inv dup(l5)	Italy
1997	Battaglia	P13	NA	NA	NA	NA	NA	4x		Yes	No	ChA, FISH	extra structurally abnormal chromosomes, ESAC, inv dup(15), Inv dup(l5)	Italy
1997	Battaglia	P14	NA	NA	NA	NA	NA	4x		Yes	No	ChA, FISH	extra structurally abnormal chromosomes, ESAC, inv dup(15), Inv dup(l5)	Italy
1997	Battaglia	P15	NA	NA	NA	NA	NA	4x		Yes	No	ChA, FISH	extra structurally abnormal chromosomes, ESAC, inv dup(15), Inv dup(l5)	Italy
2016	Bonuccelli	P16	GRCh37	23,699,501-28,525,601	BP2-BP3	4800	Maternal	3xBP2-BP3		No	Yes	Array, ChA	idic(15)	Italy
2016	Bonuccelli	P17	GRCh37	23,699,501-28,525,601	BP2-BP3	4800	Maternal	3xBP2-BP3		No	Yes	Array, ChA	idic(15)	Italy
2016	Bonuccelli	P18	GRCh37	23,699,501-28,525,601	BP2-BP3	4800	Maternal	3xBP2-BP3		No	Yes	Array, ChA	idic(15)	Italy
2016	Bonuccelli	P19	GRCh37	23,699,501-28,525,601	BP2-BP3	4800	Maternal	3xBP2-BP3		No	Yes	Array, ChA	idic(15)	Italy
2010	Battaglia	P20	NA	NA	NA	NA	NA	4x		Yes	No	ChA	idic (15) syndrome; inv dup(15) syndrome; supernumerary marker chromosome 15	Italy
2010	Battaglia	P21	NA	NA	NA	NA	NA	4x		Yes	No	ChA	idic (15) syndrome; inv dup(15) syndrome; supernumerary marker chromosome 15	Italy
2010	Battaglia	P22	NA	NA	NA	NA	NA	4x		Yes	No	ChA	idic (15) syndrome; inv dup(15) syndrome; supernumerary marker chromosome 15	Italy
2010	Battaglia	P23	NA	NA	NA	NA	NA	4x		Yes	No	ChA	idic (15) syndrome; inv dup(15) syndrome; supernumerary marker chromosome 15	Italy
2010	Battaglia	P24	NA	NA	NA	NA	NA	4x		Yes	No	ChA	idic (15) syndrome; inv dup(15) syndrome; supernumerary marker chromosome 15	Italy
2012	Wegiel	P25	NA	NA	BP3:BP3	NA	Maternal	4xBP1-BP3	Case from Wang et al	Yes	No	ChA, FISH	dup(15), Supernumerary isodicentric chromosome 15, idic15, Larger super- numerary idic(15) chromosomes	United States of America
2012	Wegiel	P26	NA	NA	BP4:BP5	NA	Maternal	4xBP1-BP4, 3x BP4-BP5	Case from Wang et al	Yes	No	ChA, FISH	dup(15), Supernumerary isodicentric chromosome 15, idic15, Larger super- numerary idic(15) chromosomes	United States of America
2012	Wegiel	P27	NA	NA	BP3:BP3	NA	Maternal	6xBP1-BP3	Case from Wang et al	Yes	No	ChA, FISH	dup(15), Supernumerary isodicentric chromosome 15, idic15, Larger super- numerary idic(15) chromosomes	United States of America
2012	Wegiel	P28	NA	NA	BP4:BP5	NA	Maternal	4xBP1-BP4, 3xBP4-BP5	Case from Wang et al	Yes	No	ChA, FISH	dup(15), Supernumerary isodicentric chromosome 15, idic15, Larger super- numerary idic(15) chromosomes	United States of America
2012	Wegiel	P29	NA	NA	BP4:BP5	NA	Maternal	4xBP1-BP4, 3xBP4-BP5	Case from Wang et al	Yes	No	ChA, FISH	dup(15), Supernumerary isodicentric chromosome 15, idic15, Larger super- numerary idic(15) chromosomes	United States of America
2012	Wegiel	P30	NA	NA	BP4:BP4	NA	NA	4xBP1-BP4	Case from Wang et al	Yes	No	ChA, FISH	dup(15), Supernumerary isodicentric chromosome 15, idic15, Larger super- numerary idic(15) chromosomes	United States of America
2012	Wegiel	P31	NA	NA	BP4:BP5, Del BP1:BP2	NA	Maternal	3xBP1-BP2, 3xBP4-BP5, 4x BP2-BP4	Case from Wang et al	Yes	No	ChA, FISH	dup(15), Supernumerary isodicentric chromosome 15, idic15, Larger super- numerary idic(15) chromosomes	United States of America
2012	Wegiel	P32	NA	NA	BP4:BP5	NA	Maternal	4xBP1-BP4, 3xBP4-BP5	Case from Wang et al	Yes	No	ChA, FISH	dup(15), Supernumerary isodicentric chromosome 15, idic15, Larger super- numerary idic(15) chromosomes	United States of America
2012	Wegiel	P33	NA	NA	BP4:BP5	NA	Maternal	4xBP1-BP4, 3xBP4-BP5	Case from Wang et al	Yes	No	ChA, FISH	dup(15), Supernumerary isodicentric chromosome 15, idic15, Larger super- numerary idic(15) chromosomes	United States of America
2022	Frohlich	P34	NA	NA	NA	NA	NA	3x		No	Yes	NA	Dup15q	United States of America
2022	Frohlich	P35	NA	NA	NA	NA	NA	4x		Yes	No	NA	Dup15q	United States of America
2022	Frohlich	P36	NA	NA	NA	NA	NA	4x		Yes	No	NA	Dup15q	United States of America
2022	Frohlich	P37	NA	NA	NA	NA	NA	4x		Yes	No	NA	Dup15q	United States of America
2022	Frohlich	P38	NA	NA	NA	NA	NA	4x		Yes	No	NA	Dup15q	United States of America
2022	Frohlich	P39	NA	NA	NA	NA	NA	4x		Yes	No	NA	Dup15q	United States of America
2022	Frohlich	P40	NA	NA	NA	NA	NA	4x		Yes	No	NA	Dup15q	United States of America
2022	Frohlich	P41	NA	NA	NA	NA	NA	4x		Yes	No	NA	Dup15q	United States of America
2022	Frohlich	P42	NA	NA	NA	NA	NA	4x		Yes	No	NA	Dup15q	United States of America
2022	Frohlich	P43	NA	NA	NA	NA	NA	3x		No	Yes	NA	Dup15q	United States of America
2022	Frohlich	P44	NA	NA	NA	NA	NA	4x		Yes	No	NA	Dup15q	United States of America
2022	Frohlich	P45	NA	NA	NA	NA	NA	4x		Yes	No	NA	Dup15q	United States of America
2022	Frohlich	P46	NA	NA	NA	NA	NA	4x		Yes	No	NA	Dup15q	United States of America
2020	Baker	P47	NA	NA	NA	NA	NA	4x		Yes	No	NA	idic15, int dup(15)	Australia
2020	Baker	P48	NA	NA	NA	NA	NA	4x		Yes	No	NA	idic15, int dup(15)	Australia
2020	Baker	P49	NA	NA	NA	NA	NA	4x		Yes	No	NA	idic15, int dup(15)	Australia
2020	Baker	P50	NA	NA	NA	NA	NA	4x		Yes	No	NA	idic15, int dup(15)	Australia
2020	Baker	P51	NA	NA	NA	NA	NA	4x		Yes	No	NA	idic15, int dup(15)	Australia
2020	Baker	P52	NA	NA	NA	NA	NA	4x		Yes	No	NA	idic15, int dup(15)	Australia
2020	Baker	P53	NA	NA	NA	NA	NA	6x	Tricentric	Yes	No	NA	idic15, int dup(15)	Australia
2020	Baker	P54	NA	NA	NA	NA	NA	3x		No	Yes	NA	idic15, int dup(15)	Australia
2020	Baker	P55	NA	NA	NA	NA	NA	3x		No	Yes	NA	idic15, int dup(15)	Australia
2020	Baker	P56	NA	NA	NA	NA	NA	3x		No	Yes	NA	idic15, int dup(15)	Australia
2005	Sahoo	P57	GRCh37	NA	BP1-BP3	NA	NA	3x		No	Yes	ChA, FISH, Array	idic(15q), Isodicentric 15q	United States of America
2005	Sahoo	P58	GRCh37	NA	BP1-BP3	NA	NA	3x		No	Yes	ChA, FISH, Array	idic(15q), Isodicentric 15q	United States of America
2005	Sahoo	P59	GRCh37	NA	BP1-BP3	NA	NA	3x		No	Yes	ChA, FISH, Array	idic(15q), Isodicentric 15q	United States of America
2005	Sahoo	P60	GRCh37	NA	BP1-BP3	NA	NA	3x		No	Yes	ChA, FISH, Array	idic(15q), Isodicentric 15q	United States of America
2005	Sahoo	P61	GRCh37	NA	BP2-BP3	NA	NA	3x		No	Yes	ChA, FISH, Array	idic(15q), Isodicentric 15q	United States of America
2005	Sahoo	P62	GRCh37	NA	BP5:BP5	NA	NA	4xBP1-BP5		Yes	No	ChA, FISH, Array	idic(15q), Isodicentric 15q	United States of America
2005	Sahoo	P63	GRCh37	NA	BP5:BP5	NA	NA	4xBP1-BP5		Yes	No	ChA, FISH, Array	idic(15q), Isodicentric 15q	United States of America
2005	Sahoo	P64	GRCh37	NA	BP5:BP5	NA	NA	4xBP1-BP5		Yes	No	ChA, FISH, Array	idic(15q), Isodicentric 15q	United States of America
2005	Sahoo	P65	GRCh37	NA	BP5:BP5	NA	NA	4xBP1-BP5		Yes	No	ChA, FISH, Array	idic(15q), Isodicentric 15q	United States of America
2005	Sahoo	P66	GRCh37	NA	BP3:BP3	NA	NA	4xBP3:BP3		Yes	No	ChA, FISH, Array	idic(15q), Isodicentric 15q	United States of America
2014	Boronat	P67	NA	NA	NA	NA	NA	3x		No	Yes	ChA, FISH	isodicentric chromosomes 15, idic(15)	United States of America
2014	Boronat	P68	NA	NA	NA	NA	NA	3x		No	Yes	ChA, FISH	isodicentric chromosomes 15, idic(15)	United States of America
2014	Boronat	P69	NA	NA	NA	NA	NA	4x		Yes	No	ChA	isodicentric chromosomes 15, idic(15)	United States of America
2014	Boronat	P70	NA	NA	NA	NA	NA	4x		Yes	No	ChA	isodicentric chromosomes 15, idic(15)	United States of America
2014	Boronat	P71	NA	NA	NA	NA	NA	4x		Yes	No	ChA	isodicentric chromosomes 15, idic(15)	United States of America
2014	Boronat	P72	NA	NA	NA	NA	NA	4x		Yes	No	ChA	isodicentric chromosomes 15, idic(15)	United States of America
2014	Boronat	P73	NA	NA	NA	NA	NA	4x		Yes	No	ChA	isodicentric chromosomes 15, idic(15)	United States of America
2014	Boronat	P74	NA	NA	NA	NA	NA	4x		Yes	No	ChA	isodicentric chromosomes 15, idic(15)	United States of America
2014	Boronat	P75	NA	NA	NA	NA	NA	4x		Yes	No	ChA	isodicentric chromosomes 15, idic(15)	United States of America
2014	Boronat	P76	NA	NA	NA	NA	NA	4x		Yes	No	ChA	isodicentric chromosomes 15, idic(15)	United States of America
2014	Boronat	P77	NA	NA	NA	NA	NA	4x		Yes	No	ChA	isodicentric chromosomes 15, idic(15)	United States of America
2021	Dangles	P78	GRCh37	20335887-27000753	BP1-BP3	6664.87	NA	3x		No	Yes	Array, FISH	idic15, supernumerary marker of chromosome 15, invdup15, supernumerary pseudo-dicentric chromosome	France
2021	Dangles	P79	GRCh37	22784523-28525460	BP1-BP3	5740.94	Maternal	3x		No	Yes	Array, FISH	idic15, supernumerary marker of chromosome 15, invdup15, supernumerary pseudo-dicentric chromosome	France
2021	Dangles	P80	GRCh37	22980072-28525460	BP1-BP3	5545.39	Maternal	3x		No	Yes	Array, FISH	idic15, supernumerary marker of chromosome 15, invdup15, supernumerary pseudo-dicentric chromosome	France
2021	Dangles	P81	GRCh37	NA	BP2-BP3	NA	NA	3x		No	Yes	FISH	idic15, supernumerary marker of chromosome 15, invdup15, supernumerary pseudo-dicentric chromosome	France
2021	Dangles	P82	GRCh37	22873688-23179948x3, 23699701-28525460x4	BP1-BP2, BP2-BP3	306,260, 4825,759	NA	3xBP1-BP2, 4x BP2-BP3		No	Yes	Array, FISH	idic15, supernumerary marker of chromosome 15, invdup15, supernumerary pseudo-dicentric chromosome	France
2021	Dangles	P83	GRCh37	NA	BP2:BP3	NA	NA	4x BP2-BP3		Yes	No	ChA, FISH	idic15, supernumerary marker of chromosome 15, invdup15, supernumerary pseudo-dicentric chromosome	France
2021	Dangles	P84	GRCh37	21939652-28525460	BP3:BP3	6585.81	NA	4xBP1-BP3		Yes	No	ChA, Array, FISH	idic15, supernumerary marker of chromosome 15, invdup15, supernumerary pseudo-dicentric chromosome	France
2021	Dangles	P85	GRCh37	20102541-28525460	BP3:BP3	8422.92	NA	4xBP1-BP3		Yes	No	ChA, Array, FISH	idic15, supernumerary marker of chromosome 15, invdup15, supernumerary pseudo-dicentric chromosome	France
2021	Dangles	P86	GRCh37	20102541-28525460	BP3:BP3	8422.92	NA	4xBP1-BP3		Yes	No	ChA, Array, FISH	idic15, supernumerary marker of chromosome 15, invdup15, supernumerary pseudo-dicentric chromosome	France
2021	Dangles	P87	GRCh37	22784523-30322079x4, 30322079-32438943x3	BP4:BP5		NA	4xBP1-BP4, 3xBP4-BP5		Yes	No	ChA, Array, FISH	idic15, supernumerary marker of chromosome 15, invdup15, supernumerary pseudo-dicentric chromosome	France
2021	Dangles	P88	GRCh37	20102541-30322079x4, 30322079-32510863x3	BP4:BP5		NA	4xBP1-BP4, 3xBP4-BP5		Yes	No	ChA, Array, FISH	idic15, supernumerary marker of chromosome 15, invdup15, supernumerary pseudo-dicentric chromosome	France
2021	Dangles	P89	GRCh37	20102541-31234158x4, 31234158-32510863x3	BP4:BP5		NA	4xBP1-BP4, 3xBP4-BP5		Yes	No	ChA, Array, FISH	idic15, supernumerary marker of chromosome 15, invdup15, supernumerary pseudo-dicentric chromosome	France
2011	Ingason	P90	NA	20306549-26208861	BP1-BP3		Maternal	3xBP1-BP3		No	Yes	Array		Denmark
2011	Ingason	P91	NA	20306549-26208861	BP1-BP3		Maternal	3xBP1-BP3		No	Yes	Array		Denmark
2011	Ingason	P92	NA	21240037-26208861	BP2-BP3		Maternal	3xBP2-BP3		No	Yes	Array		Denmark
2011	Ingason	P93	NA	21205736-26360355	BP2-BP3		Maternal	3xBP2-BP3		No	Yes	Array		Denmark
2011	Ingason	P94	NA	20306549-29344873	BP1-BP4		Maternal	3xBP1-BP4		No	Yes	Array		Denmark
2011	Ingason	P95	NA	20306549-26208861	BP1-BP3		Maternal	3xBP1-BP3		No	Yes	Array		Denmark
2011	Ingason	P96	NA	20306549-26208861	BP1-BP3		Maternal	3xBP1-BP3		No	Yes	Array		Denmark
2011	Ingason	P97	NA	21240037-26208861	BP2-BP3		Paternal	3xBP2-BP3		No	Yes	Array		Denmark
2011	Ingason	P98	NA	20306549-26208861	BP1-BP3		Paternal	3xBP1-BP3		No	Yes	Array		Denmark
2011	Ingason	P99	NA	21240037-26208861	BP2-BP3		Maternal	3xBP2-BP3		No	Yes	Array		Denmark
2011	Ingason	P100	NA	20306549-26208861	BP1-BP3		Maternal	3xBP1-BP3		No	Yes	Array		Denmark
2011	Ingason	P101	NA	20306549-26208861	BP1-BP3		Maternal	3xBP1-BP3		No	Yes	Array		Denmark
2016	Frohlich J	P102	NA	NA	NA	NA	NA	NA		Yes	No	NA	Dup15q	United States of America
2016	Frohlich J	P103	NA	NA	NA	NA	NA	NA		Yes	No	NA	Dup15q	United States of America
2016	Frohlich J	P104	NA	NA	NA	NA	NA	NA		Yes	No	NA	Dup15q	United States of America
2016	Frohlich J	P105	NA	NA	NA	NA	NA	NA		Yes	No	NA	Dup15q	United States of America
2016	Frohlich J	P106	NA	NA	NA	NA	NA	NA		Yes	No	NA	Dup15q	United States of America
2016	Frohlich J	P107	NA	NA	NA	NA	NA	NA		Yes	No	NA	Dup15q	United States of America
2016	Frohlich J	P108	NA	NA	NA	NA	NA	NA		Yes	No	NA	Dup15q	United States of America
2016	Frohlich J	P109	NA	NA	NA	NA	NA	NA		Yes	No	NA	Dup15q	United States of America
2016	Frohlich J	P110	NA	NA	NA	NA	NA	NA		Yes	No	NA	Dup15q	United States of America
2016	Frohlich J	P111	NA	NA	NA	NA	NA	NA		Yes	No	NA	Dup15q	United States of America
2016	Frohlich J	P112	NA	NA	NA	NA	NA	NA		Yes	No	NA	Dup15q	United States of America
2016	Frohlich J	P113	NA	NA	NA	NA	NA	NA		Yes	No	NA	Dup15q	United States of America
2016	Frohlich J	P114	NA	NA	NA	NA	NA	NA		Yes	No	NA	Dup15q	United States of America
2016	Frohlich J	P115	NA	NA	NA	NA	NA	NA		Yes	No	NA	Dup15q	United States of America
2016	Frohlich J	P116	NA	NA	NA	NA	NA	NA		Yes	No	NA	Dup15q	United States of America
2016	Frohlich J	P117	NA	NA	NA	NA	NA	NA		Yes	No	NA	Dup15q	United States of America
2016	Frohlich J	P118	NA	NA	NA	NA	NA	NA		Yes	No	NA	Dup15q	United States of America
2016	Frohlich J	P119	NA	NA	NA	NA	NA	NA		No	Yes	NA	Dup15q	United States of America
2016	Frohlich J	P120	NA	NA	NA	NA	NA	NA		No	Yes	NA	Dup15q	United States of America
2016	Frohlich J	P121	NA	NA	NA	NA	NA	NA		No	Yes	NA	Dup15q	United States of America
2016	Frohlich J	P122	NA	NA	NA	NA	NA	NA		No	Yes	NA	Dup15q	United States of America
2016	Frohlich J	P123	NA	NA	NA	NA	NA	NA		No	Yes	NA	Dup15q	United States of America
2016	Frohlich J	P124	NA	NA	NA	NA	NA	NA		No	Yes	NA	Dup15q	United States of America
2016	Frohlich J	P125	NA	NA	NA	NA	NA	NA		No	Yes	NA	Dup15q	United States of America
2016	Frohlich J	P126	NA	NA	NA	NA	NA	NA		No	Yes	NA	Dup15q	United States of America
2016	Frohlich J	P127	NA	NA	NA	NA	NA	NA		No	Yes	NA	Dup15q	United States of America
2016	Frohlich J	P128	NA	NA	NA	NA	NA	NA		No	Yes	NA	Dup15q	United States of America
2016	DiStefano	P129	NA	NA	NA	NA	NA	NA		Yes	No	NA	Dup15q, isodicentric chromosome 15, idic(15), supernumerary chromosome	United States of America
2016	DiStefano	P130	NA	NA	NA	NA	NA	NA		Yes	No	NA	Dup15q, isodicentric chromosome 15, idic(15), supernumerary chromosome	United States of America
2016	DiStefano	P131	NA	NA	NA	NA	NA	NA		Yes	No	NA	Dup15q, isodicentric chromosome 15, idic(15), supernumerary chromosome	United States of America
2016	DiStefano	P132	NA	NA	NA	NA	NA	NA		Yes	No	NA	Dup15q, isodicentric chromosome 15, idic(15), supernumerary chromosome	United States of America
2016	DiStefano	P133	NA	NA	NA	NA	NA	NA		Yes	No	NA	Dup15q, isodicentric chromosome 15, idic(15), supernumerary chromosome	United States of America
2016	DiStefano	P134	NA	NA	NA	NA	NA	NA		Yes	No	NA	Dup15q, isodicentric chromosome 15, idic(15), supernumerary chromosome	United States of America
2016	DiStefano	P135	NA	NA	NA	NA	NA	NA		Yes	No	NA	Dup15q, isodicentric chromosome 15, idic(15), supernumerary chromosome	United States of America
2016	DiStefano	P136	NA	NA	NA	NA	NA	NA		Yes	No	NA	Dup15q, isodicentric chromosome 15, idic(15), supernumerary chromosome	United States of America
2016	DiStefano	P137	NA	NA	NA	NA	NA	NA		Yes	No	NA	Dup15q, isodicentric chromosome 15, idic(15), supernumerary chromosome	United States of America
2016	DiStefano	P138	NA	NA	NA	NA	NA	NA		Yes	No	NA	Dup15q, isodicentric chromosome 15, idic(15), supernumerary chromosome	United States of America
2016	DiStefano	P139	NA	NA	NA	NA	NA	NA		No	Yes	NA	Dup15q, isodicentric chromosome 15, idic(15), supernumerary chromosome	United States of America
2016	DiStefano	P140	NA	NA	NA	NA	NA	NA		No	Yes	NA	Dup15q, isodicentric chromosome 15, idic(15), supernumerary chromosome	United States of America
2016	DiStefano	P141	NA	NA	NA	NA	NA	NA		No	Yes	NA	Dup15q, isodicentric chromosome 15, idic(15), supernumerary chromosome	United States of America
2013	Urraca	P142	NA	NA	BP2-BP5	12700	Maternal	3xBP2-BP5		No	Yes	Array, MS-HRM		United States of America
2013	Urraca	P143	NA	NA	BP1-BP3	82000	Maternal	3xBP1-BP3		No	Yes	Array, MS-HRM		United States of America
2013	Urraca	P144	NA	NA	BP2-BP3	5700	Paternal	3xBP2-BP3		No	Yes	Array, MS-HRM		United States of America
2013	Urraca	P145	NA	NA	BP2-BP3	5000	Maternal	3xBP2-BP3		No	Yes	Array, MS-HRM		United States of America
2013	Urraca	P146	NA	NA	BP1-BP3	6500	Maternal	3xBP1-BP3		No	Yes	Array, MS-HRM		United States of America
2013	Urraca	P147	NA	NA	BP2-BP3	5000	Maternal	3xBP2-BP3		No	Yes	Array, MS-HRM		United States of America
2013	Urraca	P148	NA	NA	BP1-BP3	8100	Maternal	3xBP1-BP3		No	Yes	Array, MS-HRM		United States of America
2013	Urraca	P149	NA	NA	BP1-BP3	5800	Maternal	3xBP1-BP3		No	Yes	Array, MS-HRM		United States of America
2013	Urraca	P150	NA	NA	BP1-BP3	5800	Paternal	3xBP1-BP3		No	Yes	Array, MS-HRM		United States of America
2013	Urraca	P151	NA	NA	BP2-BP3	5000	Paternal	3xBP2-BP3		No	Yes	Array, MS-HRM		United States of America
2013	Urraca	P152	NA	NA	BP2-BP3	5000	Paternal	3xBP2-BP3		No	Yes	Array, MS-HRM		United States of America
2013	Urraca	P153	NA	NA	BP2-BP3	5100	Maternal	3xBP2-BP3		No	Yes	Array, MS-HRM		United States of America
2013	Urraca	P154	NA	NA	BP2-BP3	5300	Maternal	3xBP2-BP3		No	Yes	Array, MS-HRM		United States of America
2013	Urraca	P155	NA	NA	BP1-BP3	8700	Maternal	3xBP1-BP3		No	Yes	Array, MS-HRM		United States of America
2016	Friedman	P156	NA	NA	NA	NA	NA	4x		Yes	No	NA	idic15, supernumerary isodicentric chromosome 15, inv dup(15)	United States of America
2016	Friedman	P157	NA	NA	BP4:BP5	NA	NA	4xBP1-BP4, 3xBP4-BP5		Yes	No	NA	idic15, supernumerary isodicentric chromosome 15, inv dup(15)	United States of America
2016	Friedman	P158	NA	NA	BP4:BP5	NA	NA	4xBP1-BP4, 3xBP4-BP5		Yes	No	NA	idic15, supernumerary isodicentric chromosome 15, inv dup(15)	United States of America
2016	Friedman	P159	NA	NA	NA	NA	NA	4x		Yes	No	NA	idic15, supernumerary isodicentric chromosome 15, inv dup(15)	United States of America
2016	Friedman	P160	NA	NA	BP4:BP5	NA	NA	4xBP1-BP4, 3xBP4-BP5		Yes	No	NA	idic15, supernumerary isodicentric chromosome 15, inv dup(15)	United States of America
2016	Friedman	P161	NA	NA	BP4:BP5	NA	NA	4xBP1-BP4, 3xBP4-BP5		Yes	No	NA	idic15, supernumerary isodicentric chromosome 15, inv dup(15)	United States of America
2016	Friedman	P162	NA	NA	NA	NA	NA	6x		Yes	No	NA	idic15, supernumerary isodicentric chromosome 15, inv dup(15)	United States of America
2016	Friedman	P163	NA	NA	NA	NA	NA	4x		Yes	No	NA	idic15, supernumerary isodicentric chromosome 15, inv dup(15)	United States of America
2016	Friedman	P164	NA	NA	NA	NA	NA	4x		Yes	No	NA	idic15, supernumerary isodicentric chromosome 15, inv dup(15)	United States of America
2016	Friedman	P165	NA	NA	NA	NA	NA	4x		Yes	No	NA	idic15, supernumerary isodicentric chromosome 15, inv dup(15)	United States of America
2016	Friedman	P166	NA	NA	NA	NA	NA	4x		Yes	No	NA	idic15, supernumerary isodicentric chromosome 15, inv dup(15)	United States of America
2016	Friedman	P167	NA	NA	NA	NA	NA	4x		Yes	No	NA	idic15, supernumerary isodicentric chromosome 15, inv dup(15)	United States of America
2016	Friedman	P168	NA	NA	NA	NA	NA	4x		Yes	No	NA	idic15, supernumerary isodicentric chromosome 15, inv dup(15)	United States of America
2016	Friedman	P169	NA	NA	NA	NA	NA	4x		Yes	No	NA	idic15, supernumerary isodicentric chromosome 15, inv dup(15)	United States of America
2016	Friedman	P170	NA	NA	NA	NA	NA	4x		Yes	No	NA	idic15, supernumerary isodicentric chromosome 15, inv dup(15)	United States of America
2016	Friedman	P171	NA	NA	NA	NA	NA	4x		Yes	No	NA	idic15, supernumerary isodicentric chromosome 15, inv dup(15)	United States of America
2016	Friedman	P172	NA	NA	NA	NA	NA	4x		Yes	No	NA	idic15, supernumerary isodicentric chromosome 15, inv dup(15)	United States of America
2016	Friedman	P173	NA	NA	NA	NA	NA	4x		Yes	No	NA	idic15, supernumerary isodicentric chromosome 15, inv dup(15)	United States of America
2016	Friedman	P174	NA	NA	BP3:BP3	NA	NA	4xBP1-BP3		Yes	No	NA	idic15, supernumerary isodicentric chromosome 15, inv dup(15)	United States of America
2021	Saravanapandian	P175	NA	NA	NA	NA	NA	4x		Yes	No	NA	supernumerary chromosome, isodicentric chromosome 15	United States of America
2021	Saravanapandian	P176	NA	NA	NA	NA	NA	4x		Yes	No	NA	supernumerary chromosome, isodicentric chromosome 15	United States of America
2021	Saravanapandian	P177	NA	NA	NA	NA	NA	4x		Yes	No	NA	supernumerary chromosome, isodicentric chromosome 15	United States of America
2021	Saravanapandian	P178	NA	NA	NA	NA	NA	4x		Yes	No	NA	supernumerary chromosome, isodicentric chromosome 15	United States of America
2021	Saravanapandian	P179	NA	NA	NA	NA	NA	4x		Yes	No	NA	supernumerary chromosome, isodicentric chromosome 15	United States of America
2021	Saravanapandian	P180	NA	NA	NA	NA	NA	4x		Yes	No	NA	supernumerary chromosome, isodicentric chromosome 15	United States of America
2021	Saravanapandian	P181	NA	NA	NA	NA	NA	4x		Yes	No	NA	supernumerary chromosome, isodicentric chromosome 15	United States of America
2021	Saravanapandian	P182	NA	NA	NA	NA	NA	4x		Yes	No	NA	supernumerary chromosome, isodicentric chromosome 15	United States of America
2021	Saravanapandian	P183	NA	NA	NA	NA	NA	4x		Yes	No	NA	supernumerary chromosome, isodicentric chromosome 15	United States of America
2021	Saravanapandian	P184	NA	NA	NA	NA	NA	4x		Yes	No	NA	supernumerary chromosome, isodicentric chromosome 15	United States of America
2021	Saravanapandian	P185	NA	NA	NA	NA	NA	4x		Yes	No	NA	supernumerary chromosome, isodicentric chromosome 15	United States of America
2021	Saravanapandian	P186	NA	NA	NA	NA	NA	4x		Yes	No	NA	supernumerary chromosome, isodicentric chromosome 15	United States of America
2021	Saravanapandian	P187	NA	NA	NA	NA	NA	4x		Yes	No	NA	supernumerary chromosome, isodicentric chromosome 15	United States of America
2021	Saravanapandian	P188	NA	NA	NA	NA	NA	3x		No	Yes	NA	supernumerary chromosome, isodicentric chromosome 15	United States of America
2021	Saravanapandian	P189	NA	NA	NA	NA	NA	3x		No	Yes	NA	supernumerary chromosome, isodicentric chromosome 15	United States of America
2020	V. Saravanapandian	P190	NA	NA	NA	NA	NA	4x		Yes	No	NA	supernumerary chromosome, isodicentric chromosome 15	United States of America
2020	V. Saravanapandian	P191	NA	NA	NA	NA	NA	4x		Yes	No	NA	supernumerary chromosome, isodicentric chromosome 15	United States of America
2020	V. Saravanapandian	P192	NA	NA	NA	NA	NA	4x		Yes	No	NA	supernumerary chromosome, isodicentric chromosome 15	United States of America
2020	V. Saravanapandian	P193	NA	NA	NA	NA	NA	4x		Yes	No	NA	supernumerary chromosome, isodicentric chromosome 15	United States of America
2020	V. Saravanapandian	P194	NA	NA	NA	NA	NA	4x		Yes	No	NA	supernumerary chromosome, isodicentric chromosome 15	United States of America
2020	V. Saravanapandian	P195	NA	NA	NA	NA	NA	4x		Yes	No	NA	supernumerary chromosome, isodicentric chromosome 15	United States of America
2020	V. Saravanapandian	P196	NA	NA	NA	NA	NA	4x		Yes	No	NA	supernumerary chromosome, isodicentric chromosome 15	United States of America
2020	V. Saravanapandian	P197	NA	NA	NA	NA	NA	4x		Yes	No	NA	supernumerary chromosome, isodicentric chromosome 15	United States of America
2020	V. Saravanapandian	P198	NA	NA	NA	NA	NA	4x		Yes	No	NA	supernumerary chromosome, isodicentric chromosome 15	United States of America
2020	V. Saravanapandian	P199	NA	NA	NA	NA	NA	4x		Yes	No	NA	supernumerary chromosome, isodicentric chromosome 15	United States of America
2020	V. Saravanapandian	P200	NA	NA	NA	NA	NA	4x		Yes	No	NA	supernumerary chromosome, isodicentric chromosome 15	United States of America
2020	V. Saravanapandian	P201	NA	NA	NA	NA	NA	4x		Yes	No	NA	supernumerary chromosome, isodicentric chromosome 15	United States of America
2020	V. Saravanapandian	P202	NA	NA	NA	NA	NA	4x		Yes	No	NA	supernumerary chromosome, isodicentric chromosome 15	United States of America
2020	V. Saravanapandian	P203	NA	NA	NA	NA	NA	4x		Yes	No	NA	supernumerary chromosome, isodicentric chromosome 15	United States of America
2020	V. Saravanapandian	P204	NA	NA	NA	NA	NA	4x		Yes	No	NA	supernumerary chromosome, isodicentric chromosome 15	United States of America
2020	V. Saravanapandian	P205	NA	NA	NA	NA	NA	4x		Yes	No	NA	supernumerary chromosome, isodicentric chromosome 15	United States of America
2020	V. Saravanapandian	P206	NA	NA	NA	NA	NA	4x		Yes	No	NA	supernumerary chromosome, isodicentric chromosome 15	United States of America
2020	V. Saravanapandian	P207	NA	NA	NA	NA	NA	4x		Yes	No	NA	supernumerary chromosome, isodicentric chromosome 15	United States of America
2020	V. Saravanapandian	P208	NA	NA	NA	NA	NA	4x		Yes	No	NA	supernumerary chromosome, isodicentric chromosome 15	United States of America
2020	V. Saravanapandian	P209	NA	NA	NA	NA	NA	4x		Yes	No	NA	supernumerary chromosome, isodicentric chromosome 15	United States of America
2020	V. Saravanapandian	P210	NA	NA	NA	NA	NA	4x		Yes	No	NA	supernumerary chromosome, isodicentric chromosome 15	United States of America
2020	V. Saravanapandian	P211	NA	NA	NA	NA	NA	4x		Yes	No	NA	supernumerary chromosome, isodicentric chromosome 15	United States of America
2020	V. Saravanapandian	P212	NA	NA	NA	NA	NA	4x		Yes	No	NA	supernumerary chromosome, isodicentric chromosome 15	United States of America
2020	V. Saravanapandian	P213	NA	NA	NA	NA	NA	4x		Yes	No	NA	supernumerary chromosome, isodicentric chromosome 15	United States of America
2020	V. Saravanapandian	P214	NA	NA	NA	NA	NA	4x		Yes	No	NA	supernumerary chromosome, isodicentric chromosome 15	United States of America
2020	V. Saravanapandian	P215	NA	NA	NA	NA	NA	4x		Yes	No	NA	supernumerary chromosome, isodicentric chromosome 15	United States of America
2020	V. Saravanapandian	P216	NA	NA	NA	NA	NA	4x		Yes	No	NA	supernumerary chromosome, isodicentric chromosome 15	United States of America
2020	V. Saravanapandian	P217	NA	NA	NA	NA	NA	3x		No	Yes	NA	supernumerary chromosome, isodicentric chromosome 15	United States of America
2020	V. Saravanapandian	P218	NA	NA	NA	NA	NA	3x		No	Yes	NA	supernumerary chromosome, isodicentric chromosome 15	United States of America
2020	V. Saravanapandian	P219	NA	NA	NA	NA	NA	3x		No	Yes	NA	supernumerary chromosome, isodicentric chromosome 15	United States of America
2020	V. Saravanapandian	P220	NA	NA	NA	NA	NA	3x		No	Yes	NA	supernumerary chromosome, isodicentric chromosome 15	United States of America
2020	V. Saravanapandian	P221	NA	NA	NA	NA	NA	3x		No	Yes	NA	supernumerary chromosome, isodicentric chromosome 15	United States of America
2020	V. Saravanapandian	P222	NA	NA	NA	NA	NA	3x		No	Yes	NA	supernumerary chromosome, isodicentric chromosome 15	United States of America
2020	V. Saravanapandian	P223	NA	NA	NA	NA	NA	3x		No	Yes	NA	supernumerary chromosome, isodicentric chromosome 15	United States of America
2020	V. Saravanapandian	P224	NA	NA	NA	NA	NA	3x		No	Yes	NA	supernumerary chromosome, isodicentric chromosome 15	United States of America
2020	V. Saravanapandian	P225	NA	NA	NA	NA	NA	3x		No	Yes	NA	supernumerary chromosome, isodicentric chromosome 15	United States of America
2020	V. Saravanapandian	P226	NA	NA	NA	NA	NA	3x		No	Yes	NA	supernumerary chromosome, isodicentric chromosome 15	United States of America
2020	V. Saravanapandian	P227	NA	NA	NA	NA	NA	3x		No	Yes	NA	supernumerary chromosome, isodicentric chromosome 15	United States of America
2020	V. Saravanapandian	P228	NA	NA	NA	NA	NA	3x		No	Yes	NA	supernumerary chromosome, isodicentric chromosome 15	United States of America
2020	V. Saravanapandian	P229	NA	NA	NA	NA	NA	3x		No	Yes	NA	supernumerary chromosome, isodicentric chromosome 15	United States of America
2020	V. Saravanapandian	P230	NA	NA	NA	NA	NA	3x		No	Yes	NA	supernumerary chromosome, isodicentric chromosome 15	United States of America
2004	Wang	P231	NCBI34/hg16	Na	BP1-BP3	NA	Maternal	3xBP1-BP3	patients excluded from Wegiel et al.	No	Yes	Array	SMC(15), idic(15), inverted dublication chromosome	United States of America
2004	Wang	P232	NCBI34/hg16	Na	BP1-BP3	NA	Maternal	3xBP1-BP3	patients excluded from Wegiel et al.	No	Yes	Array	SMC(15), idic(15), inverted dublication chromosome	United States of America
2004	Wang	P233	NCBI34/hg16	Na	BP2-BP3	NA	Maternal	3xBP2-BP3	patients excluded from Wegiel et al.	No	Yes	Array	SMC(15), idic(15), inverted dublication chromosome	United States of America
2004	Wang	P234	NCBI34/hg16	Na	BP2-BP3	NA	Maternal	3xBP2-BP3	patients excluded from Wegiel et al.	No	Yes	Array	SMC(15), idic(15), inverted dublication chromosome	United States of America
2004	Wang	P235	NCBI34/hg16	Na	BP2:BP2	NA	NA	4xBP2-BP2	patients excluded from Wegiel et al.	Yes	No	Array	SMC(15), idic(15), inverted dublication chromosome	United States of America
2004	Wang	P236	NCBI34/hg16	Na	BP3:BP3	NA	Maternal	4xBP3-BP3	patients excluded from Wegiel et al.	Yes	No	Array	SMC(15), idic(15), inverted dublication chromosome	United States of America
2004	Wang	P237	NCBI34/hg16	Na	BP4:BP5	NA	Maternal	4xBP1-BP4, 3xBP4-BP5	patients excluded from Wegiel et al.	Yes	No	Array	SMC(15), idic(15), inverted dublication chromosome	United States of America
2004	Wang	P238	NCBI34/hg16	Na	BP4:BP5	NA	NA	4xBP1-BP4, 3xBP4-BP5	patients excluded from Wegiel et al.	Yes	No	Array	SMC(15), idic(15), inverted dublication chromosome	United States of America
2004	Wang	P239	NCBI34/hg16	Na	BP5:BP5	NA	Maternal	4xBP1-BP5	patients excluded from Wegiel et al.	Yes	No	Array	SMC(15), idic(15), inverted dublication chromosome	United States of America
2004	Wang	P240	NCBI34/hg16	Na	BP5:BP5	NA	Maternal	4xBP1-BP5	patients excluded from Wegiel et al.	Yes	No	Array	SMC(15), idic(15), inverted dublication chromosome	United States of America
2004	Wang	P241	NCBI34/hg16	Na	BP3:BP3	NA	Maternal	6x	patients excluded from Wegiel et al.	Yes	No	Array	SMC(15), idic(15), inverted dublication chromosome	United States of America
2004	Wang	P242	NCBI34/hg16	NA	BP1-BP3	NA	NA	3x	patients excluded from Wegiel et al.	No	Yes	Array, FISH, Southern Plot	SMC(15), idic(15), inverted dublication chromosome	United States of America
2004	Wang	P243	NCBI34/hg16	NA	BP1-BP3	NA	NA	3x	patients excluded from Wegiel et al.	No	Yes	Array, FISH, Southern Plot	SMC(15), idic(15), inverted dublication chromosome	United States of America
2004	Wang	P244	NCBI34/hg16	NA	BP1-BP3	NA	NA	3x	patients excluded from Wegiel et al.	No	Yes	Array, FISH, Southern Plot	SMC(15), idic(15), inverted dublication chromosome	United States of America
2004	Wang	P245	NCBI34/hg16	NA	BP1-BP3	NA	NA	3x	patients excluded from Wegiel et al.	No	Yes	Array, FISH, Southern Plot	SMC(15), idic(15), inverted dublication chromosome	United States of America
2004	Wang	P246	NCBI34/hg16	NA	BP3:BP3	NA	NA	4xBP1-BP3	patients excluded from Wegiel et al.	Yes	No	Array, FISH, Southern Plot	SMC(15), idic(15), inverted dublication chromosome	United States of America
2004	Wang	P247	NCBI34/hg16	NA	BP3:BP3	NA	NA	4xBP1-BP3	patients excluded from Wegiel et al.	Yes	No	Array, FISH, Southern Plot	SMC(15), idic(15), inverted dublication chromosome	United States of America
2004	Wang	P248	NCBI34/hg16	NA	BP3:BP3	NA	NA	4xBP1-BP3	patients excluded from Wegiel et al.	Yes	No	Array, FISH, Southern Plot	SMC(15), idic(15), inverted dublication chromosome	United States of America
2004	Wang	P249	NCBI34/hg16	NA	BP3:BP3	NA	NA	4xBP1-BP3	patients excluded from Wegiel et al.	Yes	No	Array, FISH, Southern Plot	SMC(15), idic(15), inverted dublication chromosome	United States of America
2004	Wang	P250	NCBI34/hg16	NA	BP3:BP3	NA	NA	4xBP1-BP3	patients excluded from Wegiel et al.	Yes	No	Array, FISH, Southern Plot	SMC(15), idic(15), inverted dublication chromosome	United States of America
2004	Wang	P251	NCBI34/hg16	NA	BP3:BP3	NA	NA	4xBP1-BP3	patients excluded from Wegiel et al.	Yes	No	Array, FISH, Southern Plot	SMC(15), idic(15), inverted dublication chromosome	United States of America
2004	Wang	P252	NCBI34/hg16	NA	BP3:BP3	NA	NA	4xBP1-BP3	patients excluded from Wegiel et al.	Yes	No	Array, FISH, Southern Plot	SMC(15), idic(15), inverted dublication chromosome	United States of America
2004	Wang	P253	NCBI34/hg16	NA	BP3:BP3	NA	NA	4xBP1-BP3	patients excluded from Wegiel et al.	Yes	No	Array, FISH, Southern Plot	SMC(15), idic(15), inverted dublication chromosome	United States of America
2004	Wang	P254	NCBI34/hg16	NA	BP3:BP3	NA	NA	4xBP1-BP3	patients excluded from Wegiel et al.	Yes	No	Array, FISH, Southern Plot	SMC(15), idic(15), inverted dublication chromosome	United States of America
2004	Wang	P255	NCBI34/hg16	NA	BP3:BP3	NA	NA	4xBP1-BP3	patients excluded from Wegiel et al.	Yes	No	Array, FISH, Southern Plot	SMC(15), idic(15), inverted dublication chromosome	United States of America
2004	Wang	P256	NCBI34/hg16	NA	BP3:BP3	NA	NA	4xBP1-BP3	patients excluded from Wegiel et al.	Yes	No	Array, FISH, Southern Plot	SMC(15), idic(15), inverted dublication chromosome	United States of America
2004	Wang	P257	NCBI34/hg16	NA	BP3:BP3	NA	NA	4xBP1-BP3	patients excluded from Wegiel et al.	Yes	No	Array, FISH, Southern Plot	SMC(15), idic(15), inverted dublication chromosome	United States of America
2004	Wang	P258	NCBI34/hg16	NA	BP3:BP3	NA	NA	4xBP1-BP3	patients excluded from Wegiel et al.	Yes	No	Array, FISH, Southern Plot	SMC(15), idic(15), inverted dublication chromosome	United States of America
2004	Wang	P259	NCBI34/hg16	NA	BP4:BP5	NA	NA	4xBP1-BP4, 3x BP4-BP5	patients excluded from Wegiel et al.	Yes	No	Array, FISH, Southern Plot	SMC(15), idic(15), inverted dublication chromosome	United States of America
2004	Wang	P260	NCBI34/hg16	NA	BP4:BP5	NA	NA	4xBP1-BP4, 3x BP4-BP5	patients excluded from Wegiel et al.	Yes	No	Array, FISH, Southern Plot	SMC(15), idic(15), inverted dublication chromosome	United States of America
2004	Wang	P261	NCBI34/hg16	NA	BP4:BP5	NA	NA	4xBP1-BP4, 3x BP4-BP5	patients excluded from Wegiel et al.	Yes	No	Array, FISH, Southern Plot	SMC(15), idic(15), inverted dublication chromosome	United States of America
2004	Wang	P262	NCBI34/hg16	NA	BP4:BP5	NA	NA	4xBP1-BP4, 3x BP4-BP5	patients excluded from Wegiel et al.	Yes	No	Array, FISH, Southern Plot	SMC(15), idic(15), inverted dublication chromosome	United States of America
2004	Wang	P263	NCBI34/hg16	NA	BP4:BP5	NA	NA	4xBP1-BP4, 3x BP4-BP5	patients excluded from Wegiel et al.	Yes	No	Array, FISH, Southern Plot	SMC(15), idic(15), inverted dublication chromosome	United States of America
2004	Wang	P264	NCBI34/hg16	NA	BP4:BP5	NA	NA	4xBP1-BP4, 3x BP4-BP5	patients excluded from Wegiel et al.	Yes	No	Array, FISH, Southern Plot	SMC(15), idic(15), inverted dublication chromosome	United States of America
2004	Wang	P265	NCBI34/hg16	NA	BP4:BP5	NA	NA	4xBP1-BP4, 3x BP4-BP5	patients excluded from Wegiel et al.	Yes	No	Array, FISH, Southern Plot	SMC(15), idic(15), inverted dublication chromosome	United States of America
2004	Wang	P266	NCBI34/hg16	NA	BP4:BP5	NA	NA	4xBP1-BP4, 3x BP4-BP5	patients excluded from Wegiel et al.	Yes	No	Array, FISH, Southern Plot	SMC(15), idic(15), inverted dublication chromosome	United States of America
2004	Wang	P267	NCBI34/hg16	NA	BP4:BP5	NA	NA	4xBP1-BP4, 3x BP4-BP5	patients excluded from Wegiel et al.	Yes	No	Array, FISH, Southern Plot	SMC(15), idic(15), inverted dublication chromosome	United States of America
2004	Wang	P268	NCBI34/hg16	NA	BP4:BP5	NA	NA	4xBP1-BP4, 3x BP4-BP5	patients excluded from Wegiel et al.	Yes	No	Array, FISH, Southern Plot	SMC(15), idic(15), inverted dublication chromosome	United States of America
2004	Wang	P269	NCBI34/hg16	NA	BP4:BP5	NA	NA	4xBP1-BP4, 3x BP4-BP5	patients excluded from Wegiel et al.	Yes	No	Array, FISH, Southern Plot	SMC(15), idic(15), inverted dublication chromosome	United States of America
2004	Wang	P270	NCBI34/hg16	NA	BP4:BP5	NA	NA	4xBP1-BP4, 3x BP4-BP5	patients excluded from Wegiel et al.	Yes	No	Array, FISH, Southern Plot	SMC(15), idic(15), inverted dublication chromosome	United States of America
2004	Wang	P271	NCBI34/hg16	NA	BP4:BP5	NA	NA	4xBP1-BP4, 3x BP4-BP5	patients excluded from Wegiel et al.	Yes	No	Array, FISH, Southern Plot	SMC(15), idic(15), inverted dublication chromosome	United States of America
2004	Mann	P272	NA	NA	BP3:BP3	NA	NA	6xBP1-BP3	tricentric hexasomy	Yes	No	ChA, FISH	large der(15), isodicentric 15 chromosomes	United States of America
2004	Mann	P273	NA	NA	BP3:BP3	NA	NA	6xBP1-BP3	tricentric hexasomy	Yes	No	ChA, FISH	large der(15), isodicentric 15 chromosomes	United States of America
2013	Ageeli	P274	GRCh37	NA	BP3:BP3	NA	Maternal	4xBP1-BP3		Yes	No	ChA, MLPA, Array, MSI	SMC(15), ESAC, idic(15), inv dup(15)	France
2013	Ageeli	P275	GRCh37	NA	BP3:BP3	NA	Paternal	4xBP1-BP3		Yes	No	ChA, MLPA, Array, MSI	SMC(15), ESAC, idic(15), inv dup(15)	France
2013	Ageeli	P276	GRCh37	NA	BP3:BP3	NA	Maternal	4xBP1-BP3		Yes	No	ChA, MLPA, Array, MSI	SMC(15), ESAC, idic(15), inv dup(15)	France
2013	Ageeli	P277	GRCh37	NA	BP3:BP3	NA	NA	4xBP1-BP3		Yes	No	ChA, MLPA, Array, MSI	SMC(15), ESAC, idic(15), inv dup(15)	France
2013	Ageeli	P278	GRCh37	NA	BP2:BP3	NA	Maternal	4xBP1-BP2, 3xBP2-BP3		Yes	No	ChA, MLPA, Array, MSI	SMC(15), ESAC, idic(15), inv dup(15)	France
2013	Ageeli	P279	GRCh37	NA	BP3:BP3	NA	Maternal	4xBP1-BP3		Yes	No	ChA, MLPA, Array, MSI	SMC(15), ESAC, idic(15), inv dup(15)	France
2013	Ageeli	P280	GRCh37	NA	BP3:BP3	NA	Maternal	4xBP1-BP3		Yes	No	ChA, MLPA, Array, MSI	SMC(15), ESAC, idic(15), inv dup(15)	France
2013	Ageeli	P281	GRCh37	NA	BP3:BP3	NA	Maternal	4xBP1-BP3		Yes	No	ChA, MLPA, Array, MSI	SMC(15), ESAC, idic(15), inv dup(15)	France
2013	Ageeli	P282	GRCh37	NA	BP3:BP3	NA	Maternal	4xBP1-BP3		Yes	No	ChA, MLPA, Array, MSI	SMC(15), ESAC, idic(15), inv dup(15)	France
2013	Ageeli	P283	GRCh37	NA	BP3:BP3	NA	NA	4xBP1-BP3		Yes	No	ChA, MLPA, Array, MSI	SMC(15), ESAC, idic(15), inv dup(15)	France
2013	Ageeli	P284	GRCh37	NA	BP3:BP3	NA	NA	4xBP1-BP3		Yes	No	ChA, MLPA, Array, MSI	SMC(15), ESAC, idic(15), inv dup(15)	France
2013	Ageeli	P285	GRCh37	NA	BP2:BP3	NA	NA	4xBP1-BP2, 3xBP2-BP3		Yes	No	ChA, MLPA, Array, MSI	SMC(15), ESAC, idic(15), inv dup(15)	France
2013	Ageeli	P286	GRCh37	NA	BP2:BP3	NA	Maternal	4xBP1-BP2, 3xBP2-BP3		Yes	No	ChA, MLPA, Array, MSI	SMC(15), ESAC, idic(15), inv dup(15)	France
2013	Ageeli	P287	GRCh37	NA	NA	NA	NA	4x		Yes	No	ChA, MLPA, Array, MSI	SMC(15), ESAC, idic(15), inv dup(15)	France
2013	Ageeli	P288	GRCh37	NA	BP2:BP2	NA	NA	4xBP1-BP2		Yes	No	ChA, MLPA, Array, MSI	SMC(15), ESAC, idic(15), inv dup(15)	France
2013	Ageeli	P289	GRCh37	NA	BP2-BP3	NA	Maternal	3xBP2-BP3		No	Yes	ChA, MLPA, Array, MSI	SMC(15), ESAC, idic(15), inv dup(15)	France
2013	Ageeli	P290	GRCh37	NA	BP2-BP3	NA	Maternal	3xBP2-BP3		No	Yes	ChA, MLPA, Array, MSI	SMC(15), ESAC, idic(15), inv dup(15)	France
2013	Ageeli	P291	GRCh37	NA	BP2-BP3	NA	Maternal	3xBP2-BP3		No	Yes	ChA, MLPA, Array, MSI	SMC(15), ESAC, idic(15), inv dup(15)	France
2013	Ageeli	P292	GRCh37	NA	BP2-BP3	NA	NA	3xBP2-BP3		No	Yes	ChA, MLPA, Array, MSI	SMC(15), ESAC, idic(15), inv dup(15)	France
2013	Ageeli	P293	GRCh37	NA	BP2-BP3	NA	Maternal	3xBP2-BP3		No	Yes	ChA, MLPA, Array, MSI	SMC(15), ESAC, idic(15), inv dup(15)	France
2013	Ageeli	P294	GRCh37	NA	BP2-BP3	NA	Maternal	3xBP2-BP3		No	Yes	ChA, MLPA, Array, MSI	SMC(15), ESAC, idic(15), inv dup(15)	France
2013	Ageeli	P295	GRCh37	NA	BP2-BP3	NA	NA	3xBP2-BP3		No	Yes	ChA, MLPA, Array, MSI	SMC(15), ESAC, idic(15), inv dup(15)	France
2013	Ageeli	P296	GRCh37	NA	BP2-BP3	NA	Maternal	3xBP2-BP3		No	Yes	ChA, MLPA, Array, MSI	SMC(15), ESAC, idic(15), inv dup(15)	France
2013	Ageeli	P297	GRCh37	NA	BP2-BP3	NA	Maternal	3xBP2-BP3		No	Yes	ChA, MLPA, Array, MSI	SMC(15), ESAC, idic(15), inv dup(15)	France
2013	Ageeli	P298	GRCh37	NA	BP1-BP5	NA	Maternal	3xBP1-BP5		No	Yes	ChA, MLPA, Array, MSI	SMC(15), ESAC, idic(15), inv dup(15)	France
2013	Ageeli	P299	GRCh37	NA	BP1-BP3	NA	Paternal	3xBP1-BP3		No	Yes	ChA, MLPA, Array, MSI	SMC(15), ESAC, idic(15), inv dup(15)	France
2013	Ageeli	P300	GRCh37	NA	BP2-BP3	NA	Maternal	3xBP2-BP3		No	Yes	ChA, MLPA, Array, MSI	SMC(15), ESAC, idic(15), inv dup(15)	France
2013	Ageeli	P301	GRCh37	NA	BP2-BP3	NA	NA	3xBP2-BP3		No	Yes	ChA, MLPA, Array, MSI	SMC(15), ESAC, idic(15), inv dup(15)	France
2013	Ageeli	P302	GRCh37	NA	BP2-BP3	NA	Maternal	3xBP2-BP3		No	Yes	ChA, MLPA, Array, MSI	SMC(15), ESAC, idic(15), inv dup(15)	France
2013	Ageeli	P303	GRCh37	NA	BP1-BP2	NA	NA	3xBP1-BP2		No	Yes	ChA, MLPA, Array, MSI	SMC(15), ESAC, idic(15), inv dup(15)	France
2015	Q. Wang	P304	NA	NA	BP3:BP3	7700	Maternal	4xBP1-BP3		Yes	No	FISH, Array, MS-MLPA	isodicentric 15, idic(15)(q13), sSMC(15), small supernumer- ary marker chromosomes 15	China
2015	Q. Wang	P305	NA	NA	BP4:BP5	NA	Maternal	4xBP1-BP4, 3xBP4-BP5		Yes	No	ChA, Array, FISH, MS-MLPA	isodicentric 15, idic(15)(q13), sSMC(15), small supernumer- ary marker chromosomes 15	China
2015	Q. Wang	P306	NA	NA	BP4:BP5	NA	Maternal	4xBP1-BP4, 3xBP4-BP5		Yes	No	ChA, Array, FISH, MS-MLPA	isodicentric 15, idic(15)(q13), sSMC(15), small supernumer- ary marker chromosomes 15	China
2015	Q. Wang	P307	NA	NA	BP2:BP3	NA	Maternal	4xBP1-BP2, 3xBP2-BP3		Yes	No	ChA, Array, FISH, MS-MLPA	isodicentric 15, idic(15)(q13), sSMC(15), small supernumer- ary marker chromosomes 15	China
2015	Q. Wang	P308	NA	NA	BP3:BP3	NA	Maternal	4xBP1-BP3		Yes	No	ChA, Array, FISH, MS-MLPA	isodicentric 15, idic(15)(q13), sSMC(15), small supernumer- ary marker chromosomes 15	China
2015	Q. Wang	P309	NA	NA	BP3:BP4	NA	Maternal	4xBP1-BP3, 3xBP3-BP4		Yes	No	ChA, Array, FISH, MS-MLPA	isodicentric 15, idic(15)(q13), sSMC(15), small supernumer- ary marker chromosomes 15	China
2015	Q. Wang	P310	NA	NA	BP4:BP5	NA	Maternal	4xBP1-BP4, 3xBP4-BP5		Yes	No	ChA, Array, FISH, MS-MLPA	isodicentric 15, idic(15)(q13), sSMC(15), small supernumer- ary marker chromosomes 15	China
2012	Kim	P311	NCBI36	18,824,422-26,830,931	BP3:BP3	8470	NA	4xBP1-BP3		Yes	No	ChA, Array, FISH	SMC15, idic(15)	South Korea
2003	Maggouta	P312	NA	NA	BP3:BP3	NA	NA	4xBP1-BP3		Yes	No	ChA, FISH	SMC(15) , large SMC15	United Kingdom
1996	Flejter	P313	NA	NA	BP3:BP3	NA	NA	4xBP1-BP3		Yes	No	ChA, FISH	Supernumerary inv dup(15)chromosomes, inv dup(15	United States of America
1996	Flejter	P314	NA	NA	BP3:BP4	NA	NA	4xBP1-BP3, 3x BP3-BP4		Yes	No	ChA, FISH	Supernumerary inv dup(15)chromosomes, inv dup(15	United States of America
1995	Crolla	P315	NA	NA	NA	NA	Maternal	NA	Only Type 1, BP unknown.	Yes	No	ChA, FISH	Mar(15), SMC, Supernumerary marker 15 chromosomes	United Kingdom
1995	Crolla	P316	NA	NA	NA	NA	Maternal	NA	Only Type 1, BP unknown.	Yes	No	ChA, FISH	Mar(15), SMC, Supernumerary marker 15 chromosomes	United Kingdom
1995	Crolla	P317	NA	NA	NA	NA	Maternal	NA	Only Type 1, BP unknown.	Yes	No	ChA, FISH	Mar(15), SMC, Supernumerary marker 15 chromosomes	United Kingdom
1995	Crolla	P318	NA	NA	NA	NA	Maternal	NA	Only Type 1, BP unknown.	Yes	No	ChA, FISH	Mar(15), SMC, Supernumerary marker 15 chromosomes	United Kingdom
1995	Crolla	P319	NA	NA	NA	NA	Maternal	NA	Only Type 1, BP unknown.	Yes	No	ChA, FISH	Mar(15), SMC, Supernumerary marker 15 chromosomes	United Kingdom
2010	Kleefstra	P320	NA	NA	BP4:BP5	NA	Maternal	4xBP1-BP4, 3xPB4-BP5		Yes	No	ChA, FISH, MLPA	SMC(15), supernumerary marker chromosomes	Netherlands
2010	Kleefstra	P321	NA	NA	BP4:BP5	NA	Maternal	4xBP1-BP4, 3xPB4-BP5		Yes	No	ChA, FISH, MLPA	SMC(15), supernumerary marker chromosomes	Netherlands
2010	Kleefstra	P322	NA	NA	BP4:BP5	NA	Maternal	4xBP1-BP4, 3xPB4-BP5		Yes	No	ChA, FISH, MLPA	SMC(15), supernumerary marker chromosomes	Netherlands
2010	Kleefstra	P323	NA	NA	BP4:BP5	NA	Maternal	4xBP1-BP4, 3xPB4-BP5		Yes	No	ChA, FISH, MLPA	SMC(15), supernumerary marker chromosomes	Netherlands
2010	Kleefstra	P324	NA	NA	BP4:BP5	NA	Maternal	4xBP1-BP4, 3xPB4-BP5		Yes	No	ChA, FISH, MLPA	SMC(15), supernumerary marker chromosomes	Netherlands
2010	Kleefstra	P325	NA	NA	BP4:BP5	NA	Maternal	4xBP1-BP4, 3xPB4-BP5		Yes	No	ChA, FISH, MLPA	SMC(15), supernumerary marker chromosomes	Netherlands
2010	Kleefstra	P326	NA	NA	BP4:BP5	NA	Maternal	4xBP1-BP4, 3xPB4-BP5		Yes	No	ChA, FISH, MLPA	SMC(15), supernumerary marker chromosomes	Netherlands
2010	Kleefstra	P327	NA	NA	BP4:BP5	NA	Maternal	4xBP1-BP4, 3xPB4-BP5		Yes	No	ChA, FISH, MLPA	SMC(15), supernumerary marker chromosomes	Netherlands
2010	Kleefstra	P328	NA	NA	BP4:BP5	NA	Maternal	4xBP1-BP4, 3xPB4-BP5		Yes	No	ChA, FISH, MLPA	SMC(15), supernumerary marker chromosomes	Netherlands
2010	Kleefstra	P329	NA	NA	BP4:BP5	NA	Maternal	4xBP1-BP4, 3xPB4-BP5		Yes	No	ChA, FISH, MLPA	SMC(15), supernumerary marker chromosomes	Netherlands
2010	Kleefstra	P330	NA	NA	BP4:BP5	NA	Maternal	4xBP1-BP4, 3xPB4-BP5		Yes	No	ChA, FISH, MLPA	SMC(15), supernumerary marker chromosomes	Netherlands
2010	Kleefstra	P331	NA	NA	BP4:BP5	NA	Maternal	4xBP1-BP4, 3xPB4-BP5		Yes	No	ChA, FISH, MLPA	SMC(15), supernumerary marker chromosomes	Netherlands
2010	Kleefstra	P332	NA	NA	BP4:BP5	NA	Maternal	4xBP1-BP4, 3xPB4-BP5		Yes	No	ChA, FISH, MLPA	SMC(15), supernumerary marker chromosomes	Netherlands
2010	Kleefstra	P333	NA	NA	BP3:BP3	NA	Maternal	4xBP1-BP3		Yes	No	ChA, FISH, MLPA	SMC(15), supernumerary marker chromosomes	Netherlands
2010	Kleefstra	P334	NA	NA	BP3:BP3	NA	Maternal	4xBP1-BP3		Yes	No	ChA, FISH, MLPA	SMC(15), supernumerary marker chromosomes	Netherlands
2010	Kleefstra	P335	NA	NA	BP3:BP3	NA	Maternal	4xBP1-BP3		Yes	No	ChA, FISH, MLPA	SMC(15), supernumerary marker chromosomes	Netherlands
1997	Hou	P336	NA	NA	NA	NA	Maternal	NA		Yes	No	ChA, FISH	ESAC, extra structurally abnormal chromosomes,	Taiwan
1997	Hou	P337	NA	NA	NA	NA	Maternal	NA		Yes	No	ChA, FISH	ESAC, extra structurally abnormal chromosomes,	Taiwan
1997	Hou	P338	NA	NA	NA	NA	Maternal	NA		Yes	No	ChA, FISH	ESAC, extra structurally abnormal chromosomes,	Taiwan
1997	Hou	P339	NA	NA	NA	NA	Maternal	NA		Yes	No	ChA, FISH	ESAC, extra structurally abnormal chromosomes,	Taiwan
1997	Hou	P340	NA	NA	NA	NA	Maternal	NA		Yes	No	ChA, FISH	ESAC, extra structurally abnormal chromosomes,	Taiwan
1997	Hou	P341	NA	NA	NA	NA	Maternal	NA		Yes	No	ChA, FISH	ESAC, extra structurally abnormal chromosomes,	Taiwan
1997	Hou	P342	NA	NA	NA	NA	Maternal	NA		Yes	No	ChA, FISH	ESAC, extra structurally abnormal chromosomes,	Taiwan
1997	Hou	P343	NA	NA	NA	NA	Maternal	NA		Yes	No	ChA, FISH	ESAC, extra structurally abnormal chromosomes,	Taiwan
1997	Hou	P344	NA	NA	NA	NA	Maternal	NA		Yes	No	ChA, FISH	ESAC, extra structurally abnormal chromosomes,	Taiwan
1997	Hou	P345	NA	NA	NA	NA	Maternal	NA		Yes	No	ChA, FISH	ESAC, extra structurally abnormal chromosomes,	Taiwan
1997	Hou	P346	NA	NA	NA	NA	Maternal	NA		Yes	No	ChA, FISH	ESAC, extra structurally abnormal chromosomes,	Taiwan
1997	Hou	P347	NA	NA	NA	NA	Paternal	NA		Yes	No	ChA, FISH	ESAC, extra structurally abnormal chromosomes,	Taiwan
1997	Hou	P348	NA	NA	NA	NA	Paternal	NA		Yes	No	ChA, FISH	ESAC, extra structurally abnormal chromosomes,	Taiwan
1997	Hou	P349	NA	NA	NA	NA	NA	NA		Yes	No	ChA, FISH	ESAC, extra structurally abnormal chromosomes,	Taiwan
1997	Hou	P350	NA	NA	NA	NA	NA	NA		Yes	No	ChA, FISH	ESAC, extra structurally abnormal chromosomes,	Taiwan
1997	Hou	P351	NA	NA	NA	NA	NA	NA		Yes	No	ChA, FISH	ESAC, extra structurally abnormal chromosomes,	Taiwan
1997	Hou	P352	NA	NA	NA	NA	NA	NA		Yes	No	ChA, FISH	ESAC, extra structurally abnormal chromosomes,	Taiwan
2002	Eggermann	P353	NA	NA	NA	NA	NA	NA		Yes	No	ChA, FISH	Small supernumerary marker chromosomes, SMC(15), der(15)	Germany
2002	Eggermann	P354	NA	NA	NA	NA	NA	NA		Yes	No	ChA, FISH	Small supernumerary marker chromosomes, SMC(15), der(15)	Germany
2002	Eggermann	P355	NA	NA	NA	NA	NA	NA		Yes	No	ChA, FISH	Small supernumerary marker chromosomes, SMC(15), der(15)	Germany
2002	Eggermann	P356	NA	NA	NA	NA	NA	NA		Yes	No	ChA, FISH	Small supernumerary marker chromosomes, SMC(15), der(15)	Germany
2002	Eggermann	P357	NA	NA	NA	NA	NA	NA		Yes	No	ChA, FISH	Small supernumerary marker chromosomes, SMC(15), der(15)	Germany
2002	Eggermann	P358	NA	NA	NA	NA	NA	NA		Yes	No	ChA, FISH	Small supernumerary marker chromosomes, SMC(15), der(15)	Germany
2002	Eggermann	P359	NA	NA	NA	NA	NA	NA		Yes	No	ChA, FISH	Small supernumerary marker chromosomes, SMC(15), der(15)	Germany
2002	Eggermann	P360	NA	NA	NA	NA	NA	NA		Yes	No	ChA, FISH	Small supernumerary marker chromosomes, SMC(15), der(15)	Germany
2002	Eggermann	P361	NA	NA	NA	NA	NA	NA		Yes	No	ChA, FISH	Small supernumerary marker chromosomes, SMC(15), der(15)	Germany
2003	Roberts	P362	NA	NA	BP3:BP3	NA	Maternal	4xBP1-BP3	Breakpoints, within regions complex	Yes	No	ChA, FISH	SMC(15), pseudodicentric chromosome 15, inv dup(15)	United Kingdom
2003	Roberts	P363	NA	NA	BP3:BP3	NA	Maternal	4xBP1-BP3	Breakpoints, within regions complex	Yes	No	ChA, FISH	SMC(15), pseudodicentric chromosome 15, inv dup(15)	United Kingdom
2003	Roberts	P364	NA	NA	BP3:BP3	NA	Maternal	4xBP1-BP3	Breakpoints, within regions complex	Yes	No	ChA, FISH	SMC(15), pseudodicentric chromosome 15, inv dup(15)	United Kingdom
2003	Roberts	P365	NA	NA	BP3:BP3	NA	Maternal	4xBP1-BP3	Breakpoints, within regions complex	Yes	No	ChA, FISH	SMC(15), pseudodicentric chromosome 15, inv dup(15)	United Kingdom
2003	Roberts	P366	NA	NA	BP3:BP3	NA	Maternal	4xBP1-BP3	Breakpoints, within regions complex	Yes	No	ChA, FISH	SMC(15), pseudodicentric chromosome 15, inv dup(15)	United Kingdom
2003	Roberts	P367	NA	NA	BP3:BP3	NA	Maternal	4xBP1-BP3	Breakpoints, within regions complex	Yes	No	ChA, FISH	SMC(15), pseudodicentric chromosome 15, inv dup(15)	United Kingdom
2003	Roberts	P368	NA	NA	BP3:BP3	NA	Maternal	4xBP1-BP3	Breakpoints, within regions complex	Yes	No	ChA, FISH	SMC(15), pseudodicentric chromosome 15, inv dup(15)	United Kingdom
2003	Roberts	P369	NA	NA	BP3:BP3	NA	Maternal	4xBP1-BP3	Breakpoints, within regions complex	Yes	No	ChA, FISH	SMC(15), pseudodicentric chromosome 15, inv dup(15)	United Kingdom
2003	Roberts	P370	NA	NA	BP3:BP3	NA	Maternal	4xBP1-BP3	Breakpoints, within regions complex	Yes	No	ChA, FISH	SMC(15), pseudodicentric chromosome 15, inv dup(15)	United Kingdom
2003	Roberts	P371	NA	NA	BP3:BP3	NA	Maternal	4xBP1-BP3	Breakpoints, within regions complex	Yes	No	ChA, FISH	SMC(15), pseudodicentric chromosome 15, inv dup(15)	United Kingdom
2003	Roberts	P372	NA	NA	BP3:BP3	NA	Maternal	4xBP1-BP3	Breakpoints, within regions complex	Yes	No	ChA, FISH	SMC(15), pseudodicentric chromosome 15, inv dup(15)	United Kingdom
2003	Roberts	P373	NA	NA	BP3:BP3	NA	Maternal	4xBP1-BP3	Breakpoints, within regions complex	Yes	No	ChA, FISH	SMC(15), pseudodicentric chromosome 15, inv dup(15)	United Kingdom
2003	Roberts	P374	NA	NA	BP3:BP3	NA	Maternal	4xBP1-BP3	Breakpoints, within regions complex	Yes	No	ChA, FISH	SMC(15), pseudodicentric chromosome 15, inv dup(15)	United Kingdom
2003	Roberts	P375	NA	NA	BP3:BP3	NA	Maternal	4xBP1-BP3	Breakpoints, within regions complex	Yes	No	ChA, FISH	SMC(15), pseudodicentric chromosome 15, inv dup(15)	United Kingdom
2003	Roberts	P376	NA	NA	BP3:BP3	NA	Maternal	4xBP1-BP3	Breakpoints, within regions complex	Yes	No	ChA, FISH	SMC(15), pseudodicentric chromosome 15, inv dup(15)	United Kingdom
2003	Roberts	P377	NA	NA	BP3:BP3	NA	Maternal	4xBP1-BP3	Breakpoints, within regions complex	Yes	No	ChA, FISH	SMC(15), pseudodicentric chromosome 15, inv dup(15)	United Kingdom
2003	Roberts	P378	NA	NA	BP3:BP3	NA	Maternal	4xBP1-BP3	Breakpoints, within regions complex	Yes	No	ChA, FISH	SMC(15), pseudodicentric chromosome 15, inv dup(15)	United Kingdom
2003	Roberts	P379	NA	NA	BP3:BP3	NA	Maternal	4xBP1-BP3	Breakpoints, within regions complex	Yes	No	ChA, FISH	SMC(15), pseudodicentric chromosome 15, inv dup(15)	United Kingdom
2003	Roberts	P380	NA	NA	BP3:BP3	NA	Maternal	4xBP1-BP3	Breakpoints, within regions complex	Yes	No	ChA, FISH	SMC(15), pseudodicentric chromosome 15, inv dup(15)	United Kingdom
2003	Roberts	P381	NA	NA	BP3:BP3	NA	Maternal	4xBP1-BP3	Breakpoints, within regions complex	Yes	No	ChA, FISH	SMC(15), pseudodicentric chromosome 15, inv dup(15)	United Kingdom
2003	Roberts	P382	NA	NA	BP3:BP3	NA	Maternal	4xBP1-BP3	Breakpoints, within regions complex	Yes	No	ChA, FISH	SMC(15), pseudodicentric chromosome 15, inv dup(15)	United Kingdom
2003	Roberts	P383	NA	NA	BP3:BP3	NA	Maternal	4xBP1-BP3	Breakpoints, within regions complex	Yes	No	ChA, FISH	SMC(15), pseudodicentric chromosome 15, inv dup(15)	United Kingdom
2003	Roberts	P384	NA	NA	BP3:BP3	NA	Maternal	4xBP1-BP3	Breakpoints, within regions complex	Yes	No	ChA, FISH	SMC(15), pseudodicentric chromosome 15, inv dup(15)	United Kingdom
2003	Roberts	P385	NA	NA	BP3:BP3	NA	Maternal	4xBP1-BP3	Breakpoints, within regions complex	Yes	No	ChA, FISH	SMC(15), pseudodicentric chromosome 15, inv dup(15)	United Kingdom
2003	Roberts	P386	NA	NA	BP3:BP3	NA	Maternal	4xBP1-BP3	Breakpoints, within regions complex	Yes	No	ChA, FISH	SMC(15), pseudodicentric chromosome 15, inv dup(15)	United Kingdom
2003	Roberts	P387	NA	NA	BP3:BP3	NA	Maternal	4xBP1-BP3	Breakpoints, within regions complex	Yes	No	ChA, FISH	SMC(15), pseudodicentric chromosome 15, inv dup(15)	United Kingdom
2003	Roberts	P388	NA	NA	BP3:BP3	NA	Maternal	4xBP1-BP3	Breakpoints, within regions complex	Yes	No	ChA, FISH	SMC(15), pseudodicentric chromosome 15, inv dup(15)	United Kingdom
2003	Roberts	P389	NA	NA	BP3:BP3	NA	Maternal	4xBP1-BP3	Breakpoints, within regions complex	Yes	No	ChA, FISH	SMC(15), pseudodicentric chromosome 15, inv dup(15)	United Kingdom
2003	Roberts	P390	NA	NA	BP3:BP3	NA	Maternal	4xBP1-BP3	Breakpoints, within regions complex	Yes	No	ChA, FISH	SMC(15), pseudodicentric chromosome 15, inv dup(15)	United Kingdom
2003	Roberts	P391	NA	NA	BP3:BP3	NA	Maternal	4xBP1-BP3	Breakpoints, within regions complex	Yes	No	ChA, FISH	SMC(15), pseudodicentric chromosome 15, inv dup(15)	United Kingdom
2003	Roberts	P392	NA	NA	BP3:BP3	NA	Maternal	4xBP1-BP3	Breakpoints, within regions complex	Yes	No	ChA, FISH	SMC(15), pseudodicentric chromosome 15, inv dup(15)	United Kingdom
2003	Roberts	P393	NA	NA	BP3:BP3	NA	Maternal	4xBP1-BP3	Breakpoints, within regions complex	Yes	No	ChA, FISH	SMC(15), pseudodicentric chromosome 15, inv dup(15)	United Kingdom
2003	Roberts	P394	NA	NA	BP3:BP3	NA	Maternal	4xBP1-BP3	Breakpoints, within regions complex	Yes	No	ChA, FISH	SMC(15), pseudodicentric chromosome 15, inv dup(15)	United Kingdom
2003	Roberts	P395	NA	NA	BP3:BP3	NA	Maternal	4xBP1-BP3	Breakpoints, within regions complex	Yes	No	ChA, FISH	SMC(15), pseudodicentric chromosome 15, inv dup(15)	United Kingdom
2003	Roberts	P396	NA	NA	BP3:BP3	NA	Maternal	4xBP1-BP3	Breakpoints, within regions complex	Yes	No	ChA, FISH	SMC(15), pseudodicentric chromosome 15, inv dup(15)	United Kingdom
2003	Roberts	P397	NA	NA	BP3:BP3	NA	Maternal	4xBP1-BP3	Breakpoints, within regions complex	Yes	No	ChA, FISH	SMC(15), pseudodicentric chromosome 15, inv dup(15)	United Kingdom
2003	Roberts	P398	NA	NA	BP3:BP3	NA	Maternal	4xBP1-BP3	Breakpoints, within regions complex	Yes	No	ChA, FISH	SMC(15), pseudodicentric chromosome 15, inv dup(15)	United Kingdom
2003	Roberts	P399	NA	NA	BP3:BP3	NA	Maternal	4xBP1-BP3	Breakpoints, within regions complex	Yes	No	ChA, FISH	SMC(15), pseudodicentric chromosome 15, inv dup(15)	United Kingdom
2003	Roberts	P400	NA	NA	BP3:BP3	NA	Maternal	4xBP1-BP3	Breakpoints, within regions complex	Yes	No	ChA, FISH	SMC(15), pseudodicentric chromosome 15, inv dup(15)	United Kingdom
2003	Roberts	P401	NA	NA	BP3:BP3	NA	Maternal	4xBP1-BP3	Breakpoints, within regions complex	Yes	No	ChA, FISH	SMC(15), pseudodicentric chromosome 15, inv dup(15)	United Kingdom
2003	Roberts	P402	NA	NA	BP3:BP3	NA	NA	4xBP1-BP3	Breakpoints, within regions complex	Yes	No	ChA, FISH	SMC(15), pseudodicentric chromosome 15, inv dup(15)	United Kingdom
2003	Roberts	P403	NA	NA	BP3:BP3	NA	NA	4xBP1-BP3	Breakpoints, within regions complex	Yes	No	ChA, FISH	SMC(15), pseudodicentric chromosome 15, inv dup(15)	United Kingdom
2003	Roberts	P404	NA	NA	BP3:BP3	NA	NA	4xBP1-BP3	Breakpoints, within regions complex	Yes	No	ChA, FISH	SMC(15), pseudodicentric chromosome 15, inv dup(15)	United Kingdom
2003	Roberts	P405	NA	NA	BP3:BP3	NA	NA	4xBP1-BP3	Breakpoints, within regions complex	Yes	No	ChA, FISH	SMC(15), pseudodicentric chromosome 15, inv dup(15)	United Kingdom
2003	Roberts	P406	NA	NA	BP3:BP3	NA	NA	4xBP1-BP3	Breakpoints, within regions complex	Yes	No	ChA, FISH	SMC(15), pseudodicentric chromosome 15, inv dup(15)	United Kingdom
2003	Roberts	P407	NA	NA	BP3:BP3	NA	NA	4xBP1-BP3	Breakpoints, within regions complex	Yes	No	ChA, FISH	SMC(15), pseudodicentric chromosome 15, inv dup(15)	United Kingdom
2003	Roberts	P408	NA	NA	BP3:BP3	NA	NA	4xBP1-BP3	Breakpoints, within regions complex	Yes	No	ChA, FISH	SMC(15), pseudodicentric chromosome 15, inv dup(15)	United Kingdom
2003	Roberts	P409	NA	NA	BP3:BP3	NA	NA	4xBP1-BP3	Breakpoints, within regions complex	Yes	No	ChA, FISH	SMC(15), pseudodicentric chromosome 15, inv dup(15)	United Kingdom
2003	Roberts	P410	NA	NA	BP3:BP3	NA	NA	4xBP1-BP3	Breakpoints, within regions complex	Yes	No	ChA, FISH	SMC(15), pseudodicentric chromosome 15, inv dup(15)	United Kingdom
2005	Dennis	P411	NA	NA	NA	NA	NA	NA	Included in Roberts et al.	NA	NA	NA		United Kingdom
1995	Blennow	P412	NA	NA	NA	NA	NA	4x		Yes	No	ChA, FISH	ESAC, large inv dup(15)	Sweden
1995	Blennow	P413	NA	NA	NA	NA	NA	4x		Yes	No	ChA, FISH	ESAC, large inv dup(15)	Sweden
1995	Blennow	P414	NA	NA	NA	NA	NA	4x		Yes	No	ChA, FISH	ESAC, large inv dup(15)	Sweden
1995	Blennow	P415	NA	NA	NA	NA	NA	4x		Yes	No	ChA, FISH	ESAC, large inv dup(15)	Sweden
1995	Blennow	P416	NA	NA	NA	NA	NA	4x		Yes	No	ChA, FISH	ESAC, large inv dup(15)	Sweden
1995	Blennow	P417	NA	NA	NA	NA	NA	4x		Yes	No	ChA, FISH	ESAC, large inv dup(15)	Sweden
1995	Blennow	P418	NA	NA	NA	NA	NA	4x		Yes	No	ChA, FISH	ESAC, large inv dup(15)	Sweden
1995	Blennow	P419	NA	NA	NA	NA	NA	4x		Yes	No	ChA, FISH	ESAC, large inv dup(15)	Sweden
1995	Blennow	P420	NA	NA	NA	NA	NA	4x		Yes	No	ChA, FISH	ESAC, large inv dup(15)	Sweden
1995	Blennow	P421	NA	NA	NA	NA	NA	4x		Yes	No	ChA, FISH	ESAC, large inv dup(15)	Sweden

## Sheet: Suppl. Table 3
Total number of cases reported each year
Year	Patients
1995	15
1996	2
1997	21
2002	9
2003	50
2004	35
2005	5
2010	21
2012	10
2013	15
2014	9
2015	7
2016	46
2020	34
2021	20
2022	11

## Sheet: Suppl. Table 4
Nomenclature	Description/Definition
Marker Chromosomes (mar)	Marker chromosomes (mar) are structurally abnormal chromosomes that cannot be unambiguously identified or characterized using conventional banding cytogenetics. Various terms are used in the literature to describe marker chromosomes, including "supernumerary marker chromosomes" (SMC), "extra structurally abnormal chromosomes" (ESAC), and "accessory chromosomes." Importantly, no attempt should be …
Isochromosomes	Isochromosomes are chromosomes in which the two arms are mirror images of each other and genetically homozygous. However, when it is not proven that both arms are homozygous, the abbreviation ‘der’ is used instead of ‘i'. For classical isochromosomes (like (i)dic(15)), where homozygosity usually has been confirmed, the abbreviation ‘i' is typically applied.
Isodicentric Chromosomes (idic)	Isodicentric chromosomes (idic), are a specific type of abnormal chromosome that involves a single breakpoint on sister chromatids, followed by recombination. In some cases, the abbreviation ‘der’ might be used instead of ‘dic’ for such chromosomes.
Dicentric Chromosomes	Dicentric chromosomes are structurally abnormal chromosomes with two centromeres. A subtype, known as pseudodicentric chromosomes (psu dic), features two centromeres, but only one is active. The presumptively active centromere is based on the morphology in the majority of metaphases. In most dicentric chromosomes one centromere is inactivated (Chiatante et al. 2017; Therman et al. 1986).
Example	An example of karyotype notation for an isodicentric chromosome is 47,XX,+psu idic(15)(pter->q13.3::13.3->pter) which can also be simplified to 47,XX,+psu idic(15)(q13.3) assuming there is exactly one breakpoint and only one active centromere.

## Sheet: Suppl. Table 5
Number of cases stratified by breakpoint combinations
Breakpoints	n
BP3:BP3	91
BP4:BP5	43
BP5:BP5	6
BP2:BP3	5
BP2:BP2	2
BP3:BP4	2
BP4:BP4	1
BP4:BP5, Del BP1:BP2	1
